# Supplementary material
Source: PubMed Central journal article supplement (PMC6800136)
Supplement: NIHMS1048941-supplement-supplemental_data.pdf [file NIHMS1048941-supplement-supplemental_data.pdf]

## Supplementary Data

### Supplementary Figure 1

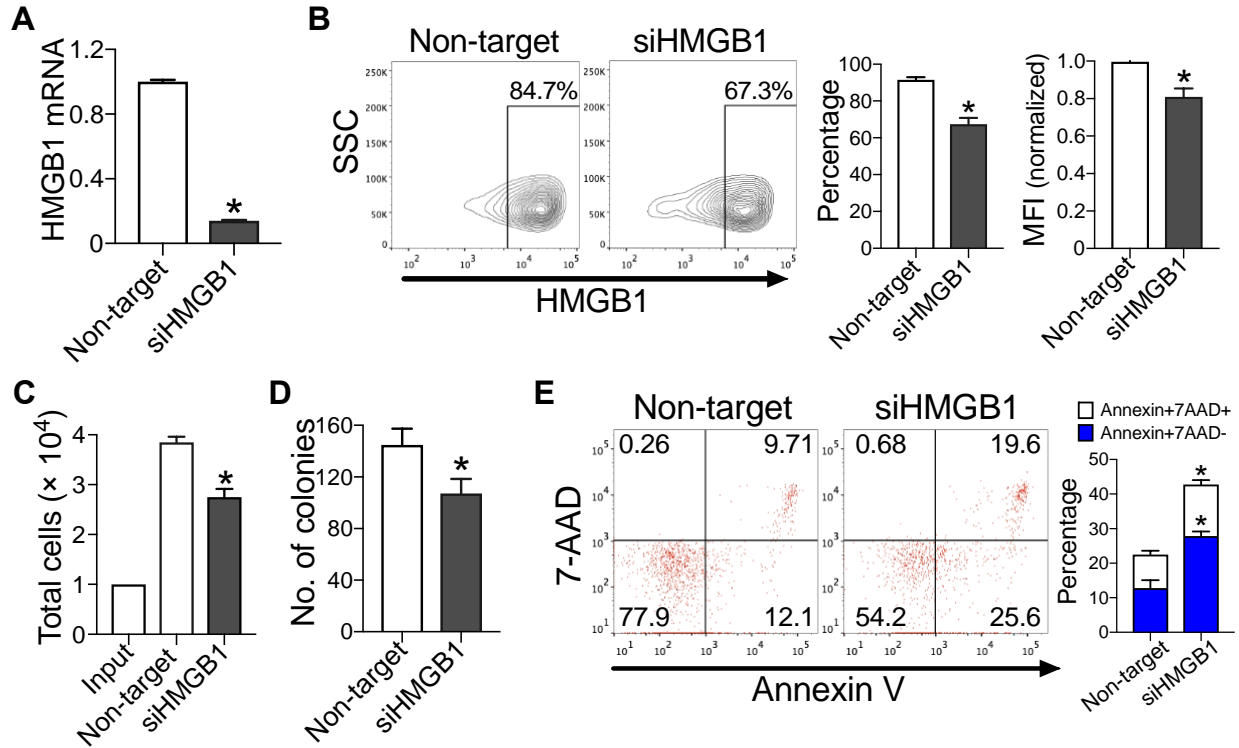

**Figure S1. Inhibition HMGB1 impairs total cell expansion and colony-forming capacity of MDS-L.** (A) RTPCR analysis of HMGB1 mRNA expression at 72 h in MDS-L cells with either non-targeting siRNA control (non-target) or HMGB1-specific siRNA (siHMGB1). \* $P < 0.0001$  for siHMGB1 compared to non-target.  $n = 3/\text{group}$ . (B) Left, representative flow cytometric analysis of HMGB1 expression of HMGB1 at 72 h for specified treatments. SSC, side-scattered light. Right, bar graphs indicate percentage of HMGB1+ population and average expression of HMGB1 in mean fluorescence intensity (MFI) value. \* $P < 0.0001$ .  $n = 5-6/\text{group}$ . (C) Total cell expansion and (D) Number of colony-forming cells (CFCs) per 1000 cells per dish containing the indicated siRNA. \* $P < 0.05$ .  $n = 4-6/\text{group}$ . (E) Apoptotic (Annexin V+ 7AAD-) and necrotic (Annexin V+ 7AAD+) populations in MDS-L containing either non-target siRNA or HMGB1-

specific siRNA. \* $P= 0.001$  and  $0.02$  for Annexin V+ 7AAD- and Annexin V+ 7AAD+, respectively.  $n= 4$ /group. Student's 2-tailed unpaired  $t$  tests were used in these analyses.

### Supplementary Figure 2

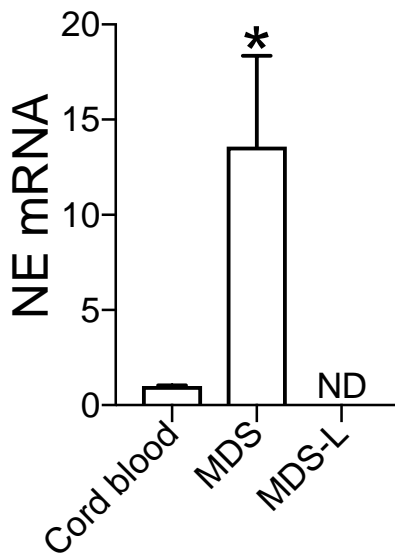

**Figure S2. Neutrophil Elastase (NE) is differentially expressed in MDS cells compared to CD34+ Cord blood.** mRNA expression of NE in primary MDS cells compared to CD34+ cord blood. NE was not detected (ND) in MDS-L cells. \* $P= 0.02$  for MDS compared to cord blood by Mann-Whitney analysis.  $n= 3-6$ /group. Student's 2-tailed unpaired  $t$  test was used in this analysis.

### Supplementary Figure 3

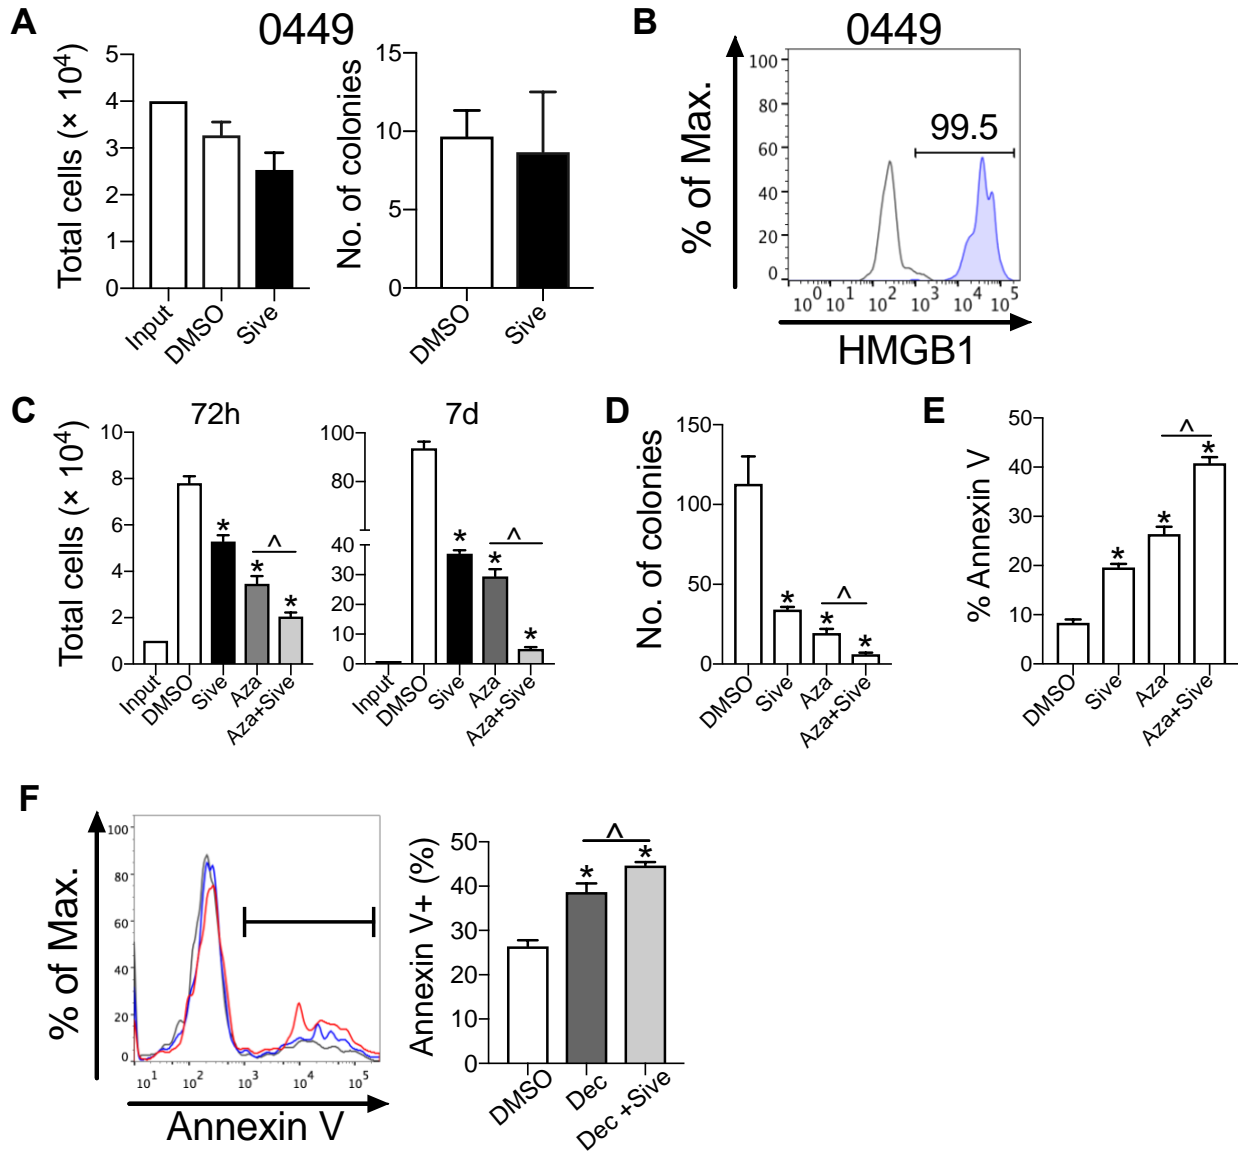

**Figure S3. Dual therapy with sivelestat and chemotherapy is additive to impair MDS**

**function compared to chemotherapy alone.** (A) Left, total cell expansion of primary marrow cells from MDS patient 0449 after 72 h incubation with 300  $\mu$ g/ml sivelestat (Sive) or DMSO.  $n=4$ /treatment. Right, number of CFCs following the treatment with sivelestat or DMSO. 5,500 cells for 0449 were plated per dish.  $n=3$ /group. (B) Flow cytometric analysis of HMGB1 expression in CD34<sup>+</sup> cells from MDS patient 0449. (C) Total cell expansion of MDS-L in cultures at 72 h and 7d with DMSO, 300  $\mu$ g/ml sivelestat, 1  $\mu$ M azacitidine, or both. \* $P \leq 0.001$  for sivelestat, Aza and

Aza+Sive compared to DMSO.  $\wedge P= 0.005$  and  $<0.0001$  for Aza compared to Aza + Sive in 72h and 7d, respectively.  $n= 5-6$ /group. **(D)** CFCs from 72 h cultures with treatments indicated in **(C)**. Number of cells from culture per dish: 1,000 cells. \*  $P \leq 0.001$  for sivelestat, Aza and Aza+Sive compared to DMSO.  $\wedge P < 0.001$  for Aza compared to Aza + Sive.  $n= 6$ /group. **(E)** Percentage annexin V+ cells by flow cytometric analysis for 72 h cultures at conditions indicated in **(C)**. \*  $P < 0.0001$  for sivelestat, Aza and Aza+Sive compared to DMSO.  $\wedge P < 0.0001$  for Aza compared to Aza + Sive.  $n= 5$ /group. **(F)** Percentage Annexin V+ cells of primary CD34+ MDS cells in culture with DMSO, 75 nM decitabine (Dec) or 75 nM decitabine and 300  $\mu\text{g/ml}$  sivelestat (Dec+Sive) for 7 days. DMSO is shown in gray, Dec in blue and Dec+Sive in red. \*  $P= 0.002$  and  $<0.0001$  for Dec and Dec+Sive compared to DMSO.  $\wedge P= 0.03$  for Dec+Sive compared to Dec, respectively.  $n= 4$ /group. Student's 2-tailed unpaired  $t$  tests were used in these analyses.

## Supplementary Figure 4

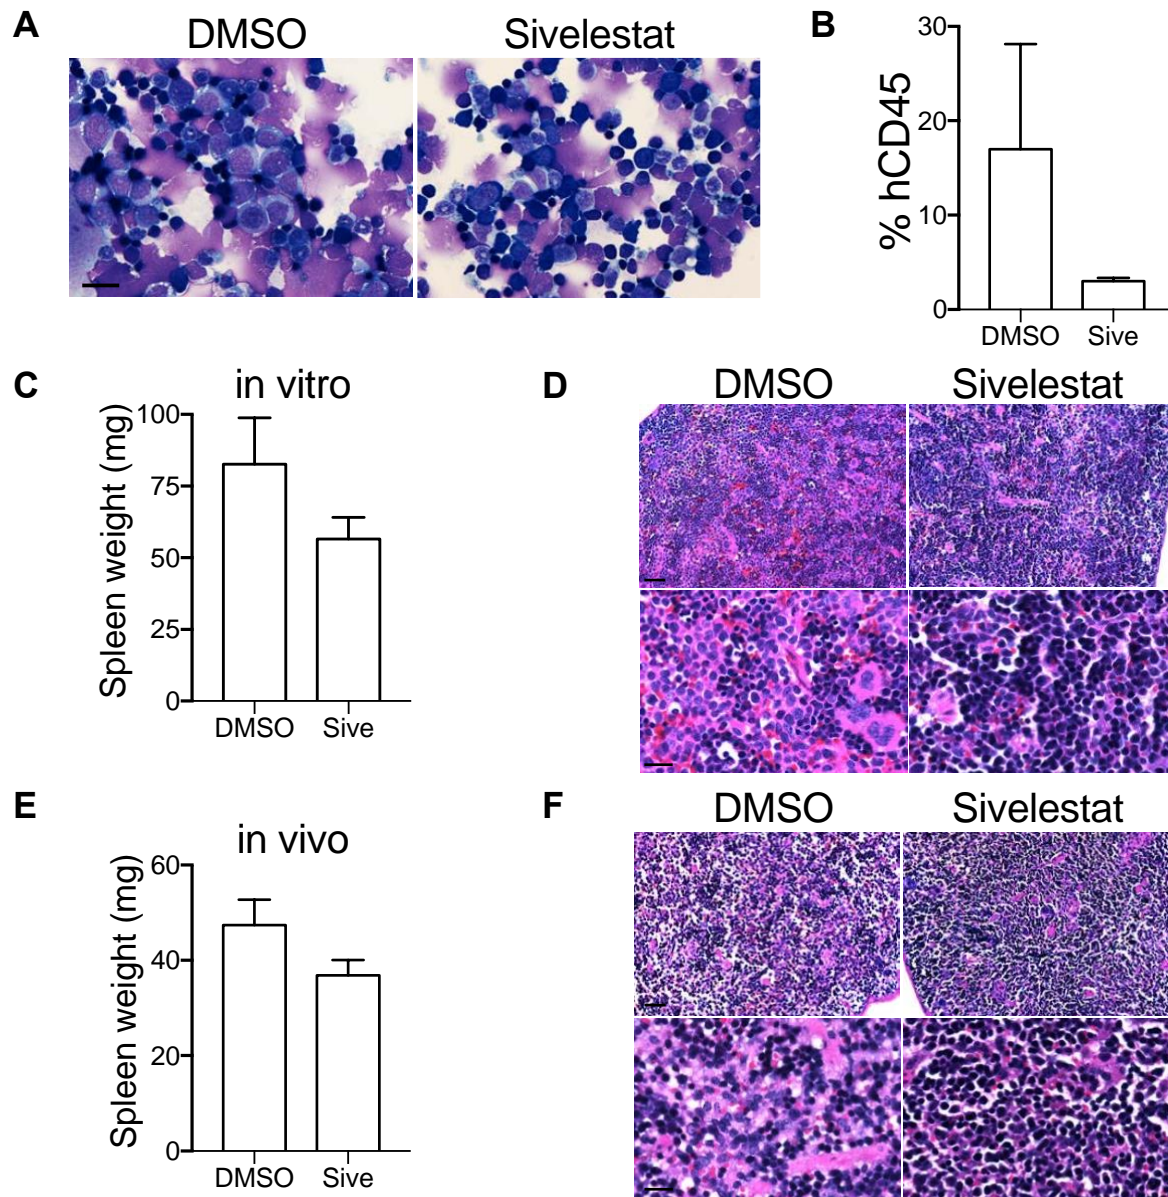

### Figure S4. Sivelestat preserved splenic architecture in mice transplanted with MDS-L

cells. The efficacy of sivelestat in an MDS xenograft model was tested in vitro and in vivo. NSG mice were transplanted with MDSL cells that were pretreated with 300  $\mu\text{g/ml}$  sivelestat for 72h in vitro (a-d). Spleens were harvested for analysis at 17 weeks post-transplantation. (A) Wright-Giemsa staining of spleen aspirates showing a lower level of MDS-L engraftment in sivelestat-treated animals. (B) Percentages of human CD45 cell engraftment in the spleen aspirates by

flow cytometric analysis. **(C)** Spleen weights are shown.  $n= 4-5/\text{group}$ . **(D)** Hematoxylin and eosin stain of section of spleen. Scale bar is 20  $\mu\text{M}$ . For testing drug in vivo, NSG mice were given sivelestat via IP injection (5 mg/kg for 7 days) 24 h after MDSL transplantation (E-F). **(E)** Spleen weights are shown.  $n= 5-7/\text{group}$ . **(F)** Hematoxylin and eosin stain of section of spleen. Scale bar 20  $\mu\text{M}$ . Student's 2-tailed unpaired  $t$  tests were used in these analyses.

## Supplementary Figure 5

### A Conditioned Medium:

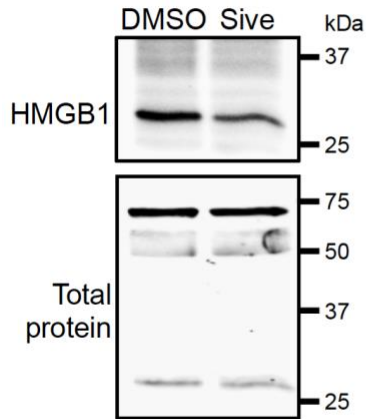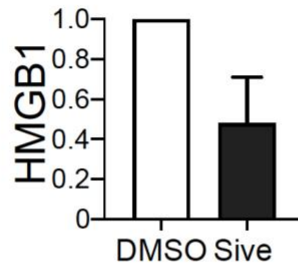

### B

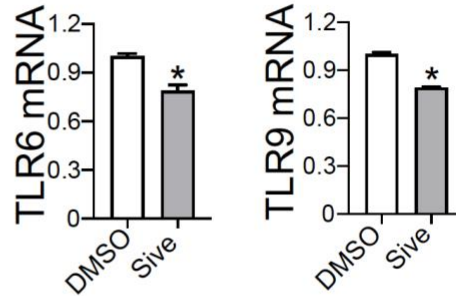

### C

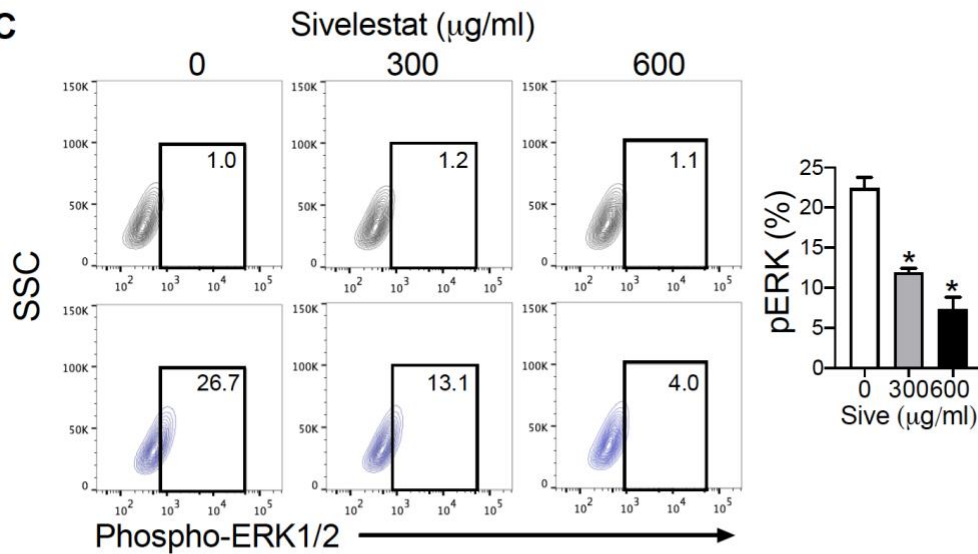

### D

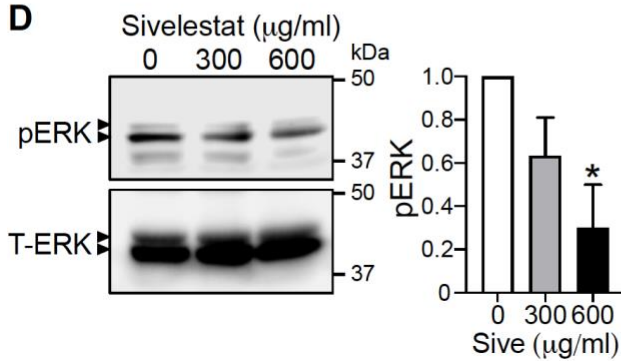

### E

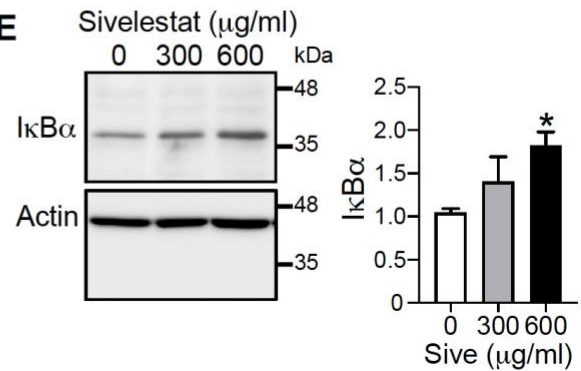

**Figure S5. Sivelestat inhibits the release of HMGB1 in primary MDS, and modulates TLR-related signaling pathways.** (A) HMGB1 protein expression by western analysis of conditioned

media from CD34+ MDS cells treated with 300  $\mu\text{g/ml}$  sivelestat or DMSO for 12h. Right, quantification of HMGB1 level in conditioned media was normalized to REVERT Total Protein Stain.  $n= 1$  for biologic sample; 2 technical replicates/group. **(B)** Quantitative RTPCR measurement of expression of TLR6 and TLR9 in MDS-L cells following culture with DMSO or 300  $\mu\text{g/ml}$  sivelestat for 4-8 h.  $*P = 0.006$  and  $<0.0001$  for TLR6 and TLR9, respectively.  $n= 3$ /group. **(C)** Left, representative flow cytometry plots of isotype (grey) and anti-phospho-ERK1/2 (blue) in MDS-L cells after incubation with sivelestat for 12 h. Positive gating was defined by isotype control in the individual treatment. Right, quantification of phospho-ERK1/2.  $*P = 0.0004$  and  $<0.0001$  for 300  $\mu\text{g/ml}$  and 600  $\mu\text{g/ml}$  sivelestat vs. DMSO, respectively.  $n= 4-8$ /group. **(D)** Levels of phospho-ERK1/2 and total ERK1/2 in MDS-L cells following 12h culture with sivelestat or DMSO. Right, quantification of phospho-ERK1/2 was normalized to total ERK for each sample.  $*P = 0.02$  for sivelestat compared to DMSO,  $n=2-3$ /group. **(E)** Protein expression of IKB $\alpha$  in MDS-L cells treated with sivelestat or DMSO for 12h.  $*P = 0.01$  for sivelestat vs DMSO,  $n=4-5$ /group. Student's 2-tailed unpaired  $t$  tests were used in these analyses.



## Supplementary Fig. 6

**A**

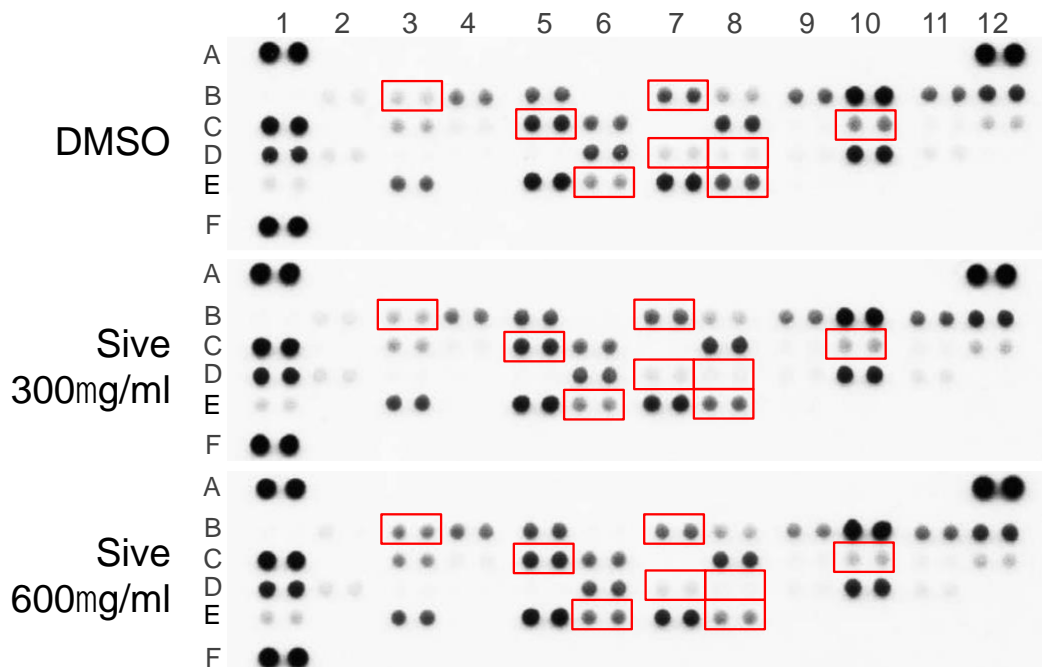

**B**

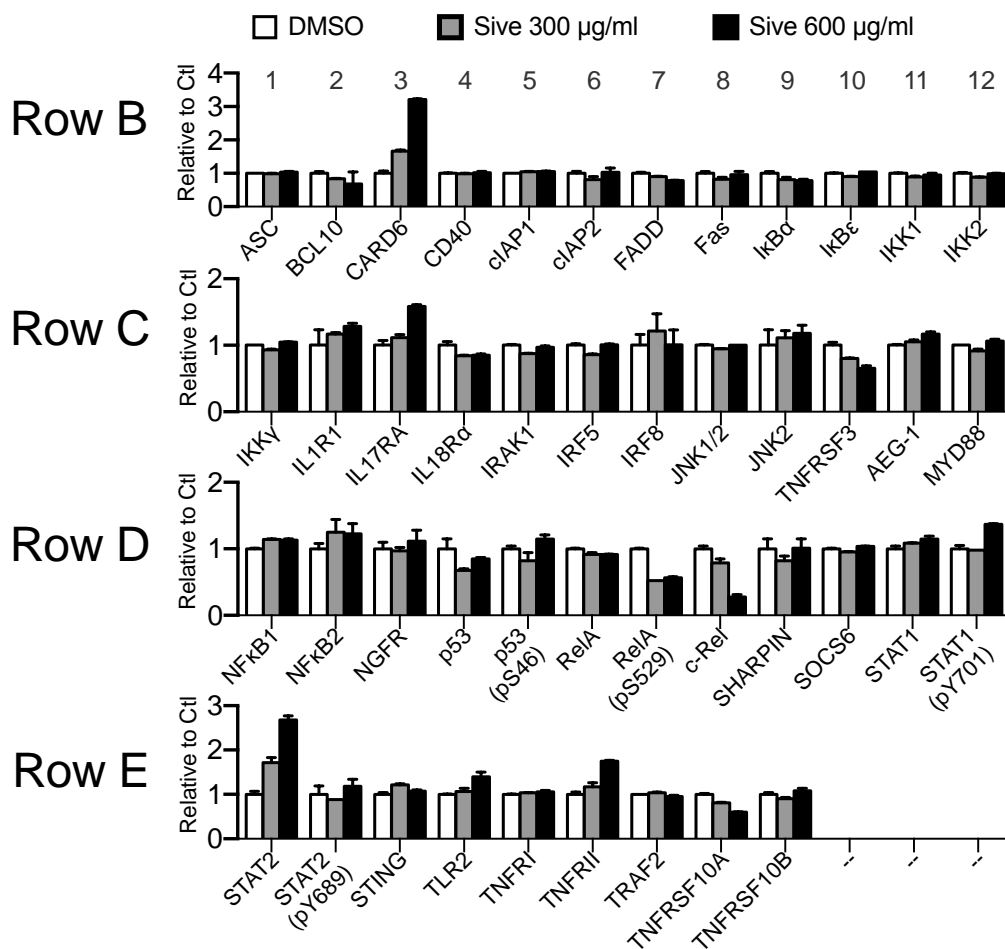

**Figure S6. Sivelestat modulates the innate immune response in MDS-L cells via the NF $\kappa$ B pathway.** Proteome Profiler Arrays for the NF $\kappa$ B pathway of protein lysates from MDS-L cells cultured with DMSO or sivelestat (300 or 600  $\mu$ g/ml) for 24 h are shown. **(A)** Images of membranes from Proteome Profiler Arrays are shown following culture sivelestat compared to control DMSO. Four pairs of reference spots are shown at the following locations: A1, A12, F1 are positive references and F12 is negative control. Proteins were assayed in duplicates. Protein targets selected in Fig. 6 are highlighted with red boxes as follows: CARD6 (B3), FADD (B7), IRAK1 (C5), TNFRSF3 (C10), RelA pS529 (D7), c-Rel (D8), TNFR2 (E6), and TNFRSF10A (E8). **(B)** Levels of proteins are quantified with ImageJ software following sivelestat treatment compared to control DMSO cultures.

## Supplementary Figure 7

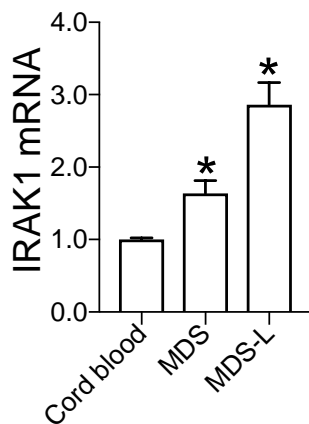

**Figure S7. Interleukin Receptor Associated Kinase-1 (IRAK1) is differentially expressed in MDS cells compared to CD34+ Cord blood.** Real-time PCR analysis of IRAK1 expression in primary MDS cells and MDS-L cells compared to CD34+ Cord blood. Data are normalized to GAPDH internal control and shown relative to CD34+ cord blood expression. \* $P= 0.005$  and  $0.0001$  for MDS and MDS-L compared to cord blood, respectively.  $n= 6$ /group. Student's 2-tailed unpaired  $t$  tests were used in these analyses.
