# Supplementary material
Source: PubMed Central journal article supplement (PMC6800136)
Supplement: NIHMS1048941-supplement-supplementary_table_1.pdf [file NIHMS1048941-supplement-supplementary_table_1.pdf]

**Table S1. Patient characteristics**

| Patient ID | Age (y) | Sex | Disease * | Cytogenetics                                       | Blast score | ANC score | Hemoglobin score | Platelet score | Cytogenetic score | IPSS-R score | IPSS-R category | Treatment & Disease evolution                | (%) HMGB ** |
|------------|---------|-----|-----------|----------------------------------------------------|-------------|-----------|------------------|----------------|-------------------|--------------|-----------------|----------------------------------------------|-------------|
| 0003       | 61      | M   | MDS-U     | 47,XY,+8[16]/46,XY[4]                              | 3           | 0         | 0                | 1              | 2                 | 6            | High            | Azacitidine. Progression to AML              | 37.8        |
| 0042       | 64      | M   | RAEB-2    | Complex, greater than 3 abnormalities              | 3           | 0         | 1                | 1              | 4                 | 9            | Very high       | No treatment                                 | 78.3        |
| 0059       | 62      | F   | MDS-U     | Normal                                             | 0           | 0         | 1.5              | 0.5            | 1                 | 3            | Low             | Azacitidine                                  | 55.4        |
| 0249       | 60      | M   | RAEB-1    | Complex, greater than 3 abnormalities              | 3           | 0         | 0                | 1              | 4                 | 8            | Very high       | No treatment                                 | 85.4        |
| 0252       | 71      | M   | RCMD      | 47,XY,+8[11]/46,XY[9]                              | 1           | 0         | 1                | 0.5            | 2                 | 4.5          | Intermediate    | No treatment                                 | 98.7        |
| 0405       | 87      | M   | RA        | Normal                                             | 1           | 0         | 1                | 0              | 1                 | 3            | Low             | No treatment                                 | 97          |
| 0427       | 70      | M   | MDS-U     | Normal                                             | 3           | 0         | 1                | 0.5            | 1                 | 5.5          | High            | Azacitidine & Decitabine. Progression to AML | 99.5        |
| 0442       | 62      | M   | MDS-U     | 47,XY,+8[2]/46,XY,del(13)(q12q22)[2]/46,XY[16]     | 2           | 0         | 0                | 0              | 2                 | 4            | Intermediate    | Azacitidine                                  | 99.2        |
| 0448       | 66      | M   | MDS-U     | Normal                                             | 2           | 0         | 0                | 0              | 1                 | 3            | Low             | No treatment                                 | 99.5        |
| 0449       | 66      | M   | MDS-U     | Normal                                             | 2           | 0         | 0                | 0              | 0                 | 2            | Low             | No treatment                                 | 99.5        |
| 0460       | 62      | M   | MDS-U     | 46,XY,del(7)(q11.2)[1]/46,XY[18]                   | 3           | 0         | 1                | 0              | 2                 | 6            | High            | No treatment                                 | 99.9        |
| 0461       | 38      | F   | MDS-U     | Normal                                             | 1           | 0         | 1                | 0              | 0                 | 2            | Low             | No treatment                                 | 99.2        |
| 0471       | 63      | M   | MDS-U     | 46,XY,del(7)(q22),del(20)(q11.2q13.1)[13]/46,XY[7] | 1           | 0         | 0                | 0.5            | 3                 | 4.5          | Intermediate    | No treatment                                 | 70.9        |

\* MDS-U, myelodysplastic syndrome-unclassified; RAEB-2, Refractory anaemia with excess blasts-2; RAEB-1, Refractory anaemia with excess blasts-1; RA, Refractory anaemia; RCMD, Refractory cytopenia with multilineage dysplasia

\*\* Percentage of HMGB1 from CD34+ cells by flow cytometric analysis
